# Supplementary material for: Virtual screening approach to identifying influenza virus neuraminidase inhibitors using molecular docking combined with machine-learning-based scoring function
Source: PubMed Central journal article supplement (PMC5669956; doi:10.18632/oncotarget.20915), 2017-09-15
Supplement: oncotarget-08-83142-s001.pdf [file oncotarget-08-83142-s001.pdf]

## **Virtual screening approach to identifying influenza virus neuraminidase inhibitors using molecular docking combined with machine-learning-based scoring function**

### **SUPPLEMENTARY MATERIALS**

**Supplementary Table 1: List of 67 neuraminidase-ligand complex used as the training set for scoring function building**

**See Supplementary File 1**

**Supplementary Table 2: Details of the 281 inhibitors and 322 non-inhibitors collected from literatures and bindingDB database**

**See Supplementary File 2**
